# Supplementary material
Source: PubMed Central journal article supplement (PMC5869817)
Supplement: JCM.01906-17_zjm999095887s1.pdf [file JCM.01906-17_zjm999095887s1.pdf]

**Table S1. Whole genome sequenced isolates from Queensland STEC cases from between 2007 to 2016 (n=13)**

| <b>Strain Name</b> | <b>Serotype</b> | <b>Accession Number</b>        |
|--------------------|-----------------|--------------------------------|
| <b>M71373</b>      | O157:H-         | <a href="#">SAMEA104371132</a> |
| <b>M7371</b>       | O157:H-         | <a href="#">SAMEA104371143</a> |
| <b>M74378</b>      | O157:H-         | <a href="#">SAMEA104371133</a> |
| <b>M74957</b>      | O157:H7         | <a href="#">SAMEA104371134</a> |
| <b>M75061</b>      | O157:H-         | <a href="#">SAMEA104371135</a> |
| <b>M75212</b>      | O157:H-         | <a href="#">SAMEA104371136</a> |
| <b>M76137</b>      | O157:H-         | <a href="#">SAMEA104371137</a> |
| <b>M76796</b>      | O157:H-         | <a href="#">SAMEA104371138</a> |
| <b>M76948</b>      | O157:H-         | <a href="#">SAMEA104371139</a> |
| <b>M77548</b>      | O157:H-         | <a href="#">SAMEA104371140</a> |
| <b>M78680</b>      | O157:H-         | <a href="#">SAMEA104371141</a> |
| <b>M78862</b>      | O157:H-         | <a href="#">SAMEA104371142</a> |
| <b>M79992</b>      | O157:H-         | <a href="#">SAMEA104371144</a> |

**Table S2. Sanger sequenced isolates from Queensland STEC cases from between 2007 to 2016 (n=50)**

| <b>Isolate</b> | <b>Serotype</b> |
|----------------|-----------------|
| M71656         | O157:H-         |
| M73323         | O157:H-         |
| M72505         | O157:H-         |
| M74874         | O157:H-         |
| M75108         | O157:H-         |
| M75309         | O157:H-         |
| M76368         | O157:H-         |
| M71247         | O157:H-         |
| M71248         | O157:H-         |
| M71284         | O157:H-         |
| M71387         | O157:H-         |
| M71972         | O157:H-         |
| M71975         | O157:H-         |
| M73607         | O157:H7         |
| M74589         | O157:H-         |
| M75418         | O157:H-         |
| M72310         | O157:H-         |
| M72612         | O157:H7         |
| M75013         | O157:H-         |
| M73802         | O157:H-         |
| M75283         | O157:H7         |
| M75313         | O157:H-         |
| M77528         | O157:H-         |
| M72682         | O157:H-         |
| M72990         | O157:H-         |
| M76457         | O157:H7         |
| M77642         | O157:H-         |
| M7761          | O157:H-         |
| M7762          | O157:H-         |
| M7763          | O157:H-         |
| M7773          | O157:H-         |
| M7779          | O157:H-         |
| M7792          | O157:H-         |
| M7807          | O157:H-         |
| M7812          | O157:H-         |
| M7813          | O157:H-         |
| M7814          | O157:H-         |
| M7815          | O157:H-         |
| M7816          | O157:H-         |
| M72867         | O157:H-         |
| M74133         | O157:H-         |
| M74844         | O157:H-         |
| M74107         | O157:H-         |
| M75741         | O157:H-         |
| M75948         | O157:H-         |
| M78576         | O157:H-         |
| M76532         | O157:H-         |
| M78231         | O157:H-         |
| M78364         | O157:H-         |
| M74180         | O157:H-         |

**Table S3. International *E. coli* strains used in this study (n=23)**

| <b>Strain Name</b> | <b>Serotype</b> | <b>Accession Number</b>  |
|--------------------|-----------------|--------------------------|
| 155                | O157:H7         | <a href="#">CP018237</a> |
| 272                | O157:H7         | <a href="#">CP018239</a> |
| 1130               | O157:H7         | <a href="#">CP017434</a> |
| 2149               | O157:H7         | <a href="#">CP017436</a> |
| 2159               | O157:H7         | <a href="#">CP017438</a> |
| 3384               | O157:H7         | <a href="#">CP017440</a> |
| 4276               | O157:H7         | <a href="#">CP017442</a> |
| 7784               | O157:H7         | <a href="#">CP018247</a> |
| 8368               | O157:H7         | <a href="#">CP017444</a> |
| 9000               | O157:H7         | <a href="#">CP018252</a> |
| 9234               | O157:H7         | <a href="#">CP017446</a> |
| CB9615             | O55:H7          | <a href="#">CP001846</a> |
| EC4115             | O157:H7         | <a href="#">CP001164</a> |
| EDL933             | O157:H7         | <a href="#">AE005174</a> |
| FRIK2069           | O157:H7         | <a href="#">CP015846</a> |
| FRIK2455           | O157:H7         | <a href="#">CP015843</a> |
| FRIK2533           | O157:H7         | <a href="#">CP015842</a> |
| FRIK944            | O157:H7         | <a href="#">CP016625</a> |
| JEONG-1266         | O157:H7         | <a href="#">CP014314</a> |
| Sakai              | O157:H7         | <a href="#">BA000007</a> |
| SS52               | O157:H7         | <a href="#">CP010304</a> |
| TW14359            | O157:H7         | <a href="#">CP001368</a> |
| WS4202             | O157:H7         | <a href="#">CP012802</a> |
